# Supplementary material for: Predictors, Neuroimaging Characteristics and Long-Term Outcome of Severe European Tick-Borne Encephalitis: A Prospective Cohort Study
Source: PLoS One. 2016 Apr 25;11(4):e0154143. doi: 10.1371/journal.pone.0154143 (PMC4844156; doi:10.1371/journal.pone.0154143)
Supplement: S2 Appendix — (XLSX) [file pone.0154143.s002.xlsx]

## Sheet: ME & MER
Datensatz TBE MER/ME: klinische Daten
					Vorschädigung PNS				ICU/IMC			Komplexsymptome				Fokal-neurologische Symptome							MRT
Fall	aRANKIN	vRANKIN	Alter	Sex	Alkohol	Diabetes	PNP	andere	ICU	Ventilation	Tracheotomie	Delir	BW-Störung	Aphasie	Anfall1	Sensibilität	HN-Paresen	Z.-Parese	P.-Parese	Ataxie	Okulomot.	Vegetativ		Lokalisation
1	5	1	24	1	0	0	0	0	1	1	1	0	1	0	1	0	1	1	0	1	1	1	1	RhoEnc
2	5	3	61	1	1	0	0	0	1	0	0	1	1	0	1	0	1	1	1	0	0	0	0
3	5	2	49	1	0	0	0	0	1	0	0	1	1	0	0	0	0	0	1	0	0	0	0
4	5	4	65	1	1	1	0	0	1	1	1	1	1	0	0	0	0	0	1	0	0	0	1	Thal.
5	5	6	62	1	0	1	0	0	1	1	1	0	1	0	0	0	0	0	1	0	0	0	1	Thal.
6	3	1	74	1	0	0	0	0	0	0	0	1	1	1	0	0	0	0	0	0	0	0	x
8	5	4	50	1	x	x	x	0	1	1	0	0	1	0	1	0	0	0	1	0	0	0	0
9	2	1	62	1	0	0	0	0	0	0	0	1	0	1	0	0	0	0	0	0	0	0	1	Virchov KM
10	3	0	51	2	0	0	0	0	1	0	0	0	0	0	0	0	0	1	0	1	0	0	1	Thal.
11	5	4	63	1	1	1	1	1	1	1	0	1	1	0	1	0	1	1	1	0	0	0	x
12	3	1	40	1	x	0	0	0	1	0	0	0	0	0	0	0	0	1	0	0	0	0	1	Thal./Caps. int
13	4	1	51	1	1	0	0	0	1	0	0	0	1	0	0	0	0	1	0	0	0	0	0
14	5	1	71	1	0	1	1	1	1	1	0	1	1	0	0	0	1	0	1	0	0	0	0
15	3	0	69	1	0	0	0	0	0	0	0	0	1	0	0	0	0	0	0	1	0	0	0
16	2	0	17	1	0	0	0	0	0	0	0	0	0	0	0	0	0	0	0	1	1	0	0
17	3	1	33	1	0	0	0	0	0	0	0	0	0	0	0	0	0	1	0	0	0	0	0
18	4	0	38	1	0	0	0	0	0	0	0	1	0	0	1	0	0	1	0	1	0	0	0
19	3	1	31	1	0	0	0	0	0	0	0	1	0	1	0	0	0	0	0	0	0	0	0
21	5	4	64	1	0	1	1	0	1	0	0	0	1	0	1	0	0	1	1	0	0	0	0
22	4	2	71	1	0	0	0	0	1	0	0	0	0	0	1	0	0	0	0	1	0	0	x
23	5	0	75	1	0	1	0	0	0	0	0	1	0	1	1	0	0	0	0	1	0	1	x
24	4	1	53	1	0	0	0	0	1	0	0	0	1	0	0	0	0	0	0	0	1	0	0
25	4	1	17	2	0	0	0	0	0	0	0	0	1	0	0	0	0	0	0	0	0	0	0
27	5	0	55	2	0	1	0	0	1	0	0	1	1	0	0	0	0	1	0	1	0	0	0
30	4	1	69	1	0	0	0	0	0	0	0	0	0	0	1	0	0	1	0	1	1	0	0
32	5	6	73	2	0	0	0	0	1	1	0	0	1	0	0	0	0	0	1	0	0	0	x
33	5	6	75	1	0	0	0	0	1	1	0	1	1	0	0	0	0	0	1	0	0	0	x
34	5	6	61	1	1	1	1	0	1	1	1	1	1	0	0	0	0	0	1	0	0	0	x
35	4	2	68	1	1	0	0	0	0	0	0	1	1	0	0	1	0	0	0	1	0	0	x
36	5	2	58	1	0	1	0	0	0	0	0	1	1	0	0	0	0	0	0	1	1	1	x
37	5	0	56	1	0	0	0	0	1	0	0	1	0	0	0	1	0	0	0	1	0	0	x
38	3	1	55	1	1	0	0	1	0	0	0	1	0	0	0	0	0	0	0	1	0	0	0
42	5	2	63	1	1	0	0	0	1	0	0	0	1	0	0	0	0	0	0	0	1	0	0
70	4	3	68	2	0	0	0	0	1	0	0	0	0	0	0	0	0	0	1	0	0	0	1	Plex.
72	5	1	74	1	0	0	0	0	1	0	0	1	1	0	0	0	0	0	0	1	1	0	0
74	3	1	59	1	0	0	0	0	0	0	0	1	0	0	0	0	0	0	0	0	1	0	0
77	4	0	34	2	0	0	0	0	1	0	0	0	1	0	1	0	0	0	0	0	0	0	0
80	3	1	60	1	0	0	0	0	0	0	0	0	0	0	0	0	0	0	0	1	1	0	0
81	5	4	62	1	0	1	0	1	0	0	0	1	1	0	0	0	0	0	1	0	0	0	1	Plex.
84	4	0	69	2	0	1	0	0	0	0	0	0	1	0	1	0	0	0	0	1	0	0	x
85	4	2	42	2	0	0	0	0	1	0	0	0	0	1	1	0	0	0	0	0	0	0	0
88	3	0	61	1	0	0	0	1	0	0	0	0	0	0	1	0	0	0	0	1	0	0	0
93	4	2	51	1	0	0	0	0	1	0	0	1	0	0	0	0	0	0	1	0	0	0	1	Plex./Neurit.
95	4	3	62	1	1	0	0	0	0	0	0	0	1	0	0	1	0	0	1	0	0	0	1	Plex.
96	4	1	62	2	0	0	0	1	0	0	0	0	0	0	0	0	0	1	0	0	0	0	x
98	5	3	70	2	1	0	0	0	1	0	0	1	1	0	0	0	0	0	0	0	0	0	0
101	5	4	48	2	0	0	0	0	1	0	0	0	1	0	0	0	1	1	1	0	0	0	1	EncMyeloRad
1Dokumentierter Anfall oder pathol. EEG: min. steile Abläufe ; Polyspikes, Sharp-Wave, Spike-Wave
Legende: 0 = nicht vorhanden; 1 = vorhanden oder männliches Geschlecht; 2 = weibliches Geschlecht; 9 = nicht beurteilbar

## Sheet: Meningitis Seqelae
Datensatz TBE Meningitis: Out-Come & Sequelae
			irgendwelche		RANKIN		ADL	EF-wirksam
Fall	Alter	Sex	Beschwerden1	Alle	Male	female	wirksam	(EU)	Epilepsie	Schwindel	Kopfschmerzen	Schlafstörungen	Neurasthenie2	Depression	Freitext
20	35	1	1	1	1		0	0	0	0	0	0	1	0	Schwitzen
26	43	1	0	0	0		x	0	0	0	0	0	0	0
28	37	2	1	1		1	1	0	0	1	1	0	1	0	"Wie auf Schiff laufen"
29	65	1	0	0	0		x	x	0	0	0	0	0	0
31	59	1	0	0	0		x	0	0	0	0	0	0	0
39	53	2	1	1		1	1	0	0	0	0	0	1	0
40	23	2	0	0		0	x	0	0	0	0	0	0	0
41	38	1	0	0	0		x	0	0	0	0	0	0	0
42	63	1	1	2	2		1	0	0	0	0	0	1	0	Schitzen, Kognitive Defizite
43	70	2	1	2		2	1	0	0	0	1	0	0	0	Kognitive Defizite
44	61	2	0	0		0	x	0	0	0	0	0	0	0
45	38	2	1	1		1	1	0	0	0	1	0	1	0
46	18	1	0	0	0		x	0	0	0	0	0	0	0
47	x	x	x	x			x	x	x	x	x	x	x	x
48	38	2	1	2		2	1	1	0	0	1	1	1	1	Teil-EU (reduziert)
49	46	2	0	0		0	x	0	0	0	0	0	0	0
50	47	2	0	0		0	x	0	0	0	0	0	0	0
51	x	x	x	x			x	x	x	x	x	x	x	x
52	17	1	0	0	0		x	0	0	0	0	0	0	0
53	18	2	0	0		0	x	0	0	0	0	0	0	0
54	43	2	0	0		0	x	0	0	0	0	0	0	0
55	55	1	1	3	3		1	1	0	1	1	1	1	1	EU-Rente
56	47	1	0	0	0		x	0	0	0	0	0	0	0
57	47	2	0	0		0	x	0	0	0	0	0	0	0
58	57	1	0	0		0	x	0	0	0	0	0	0	0
59	x	x	x	x			x	x	x	x	x	x	x	x
60	52	2	0	0		0	x	0	0	0	0	0	0	0
61	46	1	0	0		0	x		0	0	0	0	0	0
62	x	x	x	x			x	x	x	x	x	x	x	x
63	32	1	0	0	0		x	0	0	0	0	0	0	0
64	68	1	0	0	0		x	0	0	0	0	0	0	0
65	61	1	0	0	0		x	0	0	0	0	0	0	0
66	35	1	1	1	1		0	0	0	0	0	0	1	0
67	68	2	1	1		1	0	x	0	0	1	0	0	0
68	34	1	0	0	0		x	0	0	0	0	0	0	0
69	51	2	0	0		0	x	0	0	0	0	0	0	0
71	61	1	0	0	0		x	0	0	0	0	0	0	0
73	58	1	1	1	1		0	0	0	0	1	1	1	0
75	17	1	0	0	0		x	0	0	0	0	0	0	0
76	48	1	0	0	0		x	0	0	0	0	0	0	0
77	34	2	0	0		0	0	0	0	0	0	0	0	0
78	42	2	1	2		2	1	1	0	1	0	0	0	0	Gereiztheit, Job reduziert
79	39	2	0	0		0	x	0	0	0	0	0	0	0
82	47	1	0	0	0		x	0	0	0	0	0	0	0
83	41	2	0	0		0	x	0	0	0	0	0	0	0
86	56	1	0	0	0		x	0	0	0	0	0	0	0
87	41	1	0	0	0		x	0	0	0	0	0	0	0
89	43	1	0	0	0		x	0	0	0	0	0	0	0
90	65	1	0	0	0		x	0	0	0	0	0	0	0
91	48	1	0	0	0		x	0	0	0	0	0	0	0
92	20	1	0	0	0		x	0	0	0	0	0	0	0
94	22	2	1	1		1	1	0	0	1	1	0	0	0
97	45	2	1	1		1	1	0	0	1	0	0	0	0	Gleichgewichtsstörung, Höhenangst (banale höhe:Treppe)
99	68	1	0	0	0		x	0	0	0	0	0	0	0
100	50	1	0	0	0		x	0	0	0	0	0	0	0
39/2	42	1	1	1	1		0	0	0	0	0	1	0	0	schmerzh. Dysästhesie
41/2	34	1	1	1	1		0	0	0	0	0	0	0	0	Tremor re. Hand
42/2	26	1	1	1	1		0	0	0	0	0	0	1	0
43/2	51	2	1	1		1	0	0	0	0	0	0	0	0	Bitrigeminal NV1+2: Schmerz+Hyperämie
44/2	69	2	0	0		0	x	x	0	0	0	0	0	0
70/2	x	x	x	x			x	x	x	x	x	x	x	x
73/2	39	2	0	0		0	x	0	0	0	0	0	0	0
91/2	48	2	1	2		2	1	0	0	1	1	1	1	0	Gereiztheit, Lärmempfindlich
95/2	32	1	1	1	1		1	0	0	0	1	0	0	0	unspez. Körperliche Anfälligkeit
Beschwerden1: 0=keine, 1=positive Angaben, X=nicht beurteilbar, da Interferenz mit andere Neurologischer Erkrankung oder für Interview nicht erreichbar
Neurasthenie2: inklusive Reizbarkeit; Stimmungsschwankuneg, die nicht Depression erfüllen
ADL wirksam: 0=leicht, ADL neg.; 1=mäßig (subj.), aber keine Beeinträchtigung auf ADL; 3=deutlich, Einfluss auf ADL; 4=mit Effekt auf EU

## Sheet: Demographics
Datensatz TBE alle: Demographic
						anual	Lifetime [abs]	Lifetime [s]	Freizeit
Fall	Alter	Sex	Tick-bite	Vaccination1	Biphasic	Tick-bites	Tick-bites3	Tick-bites3	Frequenz4	Aktivität2
1	24	1	1	5	1	2	2	2	1	Joggen
2	61	1	0	0	1	x	x	x	x	Spaziergang
3	49	1	1	0	1	x	x	x	x	x
4	65	1	1	3	0	5	235	6	3	Jäger
5	62	1	1	0	1	x	x	x	x	Spaziergänge
6	74	1	1	0	0	x	x	x	3	Gartenarbeit
8	50	1	0	0	0	3	96	5	3	Hund
9	62	1	1	0	1	5	210	6	3	Gartenarbeit
10	51	2	0	0	1	4	132	6	3	Landwirt
11	63	1	1	0	0	x	x	x	3	Spaziergänge
12	40	1	x	x	x	x	x	x	x	x
13	51	1	1	4	0	8	256	7	3	Holzarbeiten
14	71	1	1	0	1	2	104	6	2	Golfen, Spazieren
15	69	1	1	0	1	5	255	7	3	Holzarbeiten, Schafzucht (Hobby)
16	17	1	0	0	0	0	4	2	1	Grillen im Wald
17	33	1	1	0	1	x	x	x	x	?
18	38	1	0	0	1	x	50	4	2	Joggen, Holzmachen
19	31	1	0	3	0	0	8	2	1	Spazieren
20	35	1	1	0	0	1	1	1	3	Garten
21	64	1	1	0	0	0	15	3	2	Forstarbeit
22	71	1	1	0	0	x	x	x	x	Hund
23	75	1	0	0	0	4	171	6	3	Gartenarbeit
24	53	1	1	0	1	5	125	6	3	Landwirt
25	17	2	0	0	1	x	50	4	3	Hund
26	43	1	1	2	0	20	500	7	3	Landwirt
27	55	2	1	0	0	2	72	5	3	Spazieren
28	37	2	1	0	0	0	10	3	2	Pilzesammeln
29	65	1	1	0	1	4	188	6	3	Holzarbeiten, Joggen, Hund
30	69	1	1	0	0	10	648	7	2	Pilzesammeln, Reiten
31	59	1	1	0	0	1	59	5	2	Pilzesammeln
32	73	2	0	0	0	x	x	x	x	x
33	75	1	0	0	0	x	x	x	x	x
34	61	1	0	0	0	x	x	x	x	x
35	68	1	1	0	1	4	200	6	3	Landwirt, Forstwirt
36	58	1	1	0	1	3	x	6	3	Hund, Wandern
37	56	1	0	0	0	3	114	6	3	Hund
38	55	1	1	Dengue-pos.	1	x	x	x	x	Jäger
39	53	2	1	1	1	0	5	2	3	Spazieren, Hund
40	23	2	1	0	0	0	20	3	2	Hund, Spazieren, Geocachen
41	38	1	1	0	1	x	4	2	1	Spazieren
42	63	1	1	0	0	5	225	6	3	Landwirt
43	70	2	x	x	x	12	636	7	3	Gartenarbeit, Ackerarbeit
44	68	2	1	0	x	10	500	7	3	Spazieren, Beeren sammelns
45	38	2	1	0	1	0	20	3	2	Spaziere, Hund, Pilzesammeln
46	18	1	0	0	1	0	7	2	2	Joggen, Spazieren, Fahrrad
47	x	x	x	x	x	x	x	x	x	x
48	38	2	1	0	1	0	10	3	2	Joggen
49	46	2	x	x	x	x	x	x	x	x
50	47	2	1	0	1	0	7	2	2	Spazieren
51	x	x	x	x	x	x	x	x	x	x
52	17	1	1	0	1	0	9	2	1	Fahrradfahren
53	18	2	1	0	1	5	60	5	1	Wandern, Radfahren
54	43	2	1	x	x	x	x	x	x	x
55	55	1	1	0	0	0	22	3	3	Gärtner
56	47	1	1	0	0	0	4	2	3	Jäger
57	47	2	1	0	1	0	0	0	2	Joggen, Spazieren, Hund
58	57	1	1	0	x	3	120	6	1	Mountainbiken, Beerensammeln
59	46	2	1	0	0	0	90	5	2	Joggen
60	52	2	0	0	0	0	0	0	3	Hund
61	46	1	1	0	1	3	87	5	3	Pferdepfleger
62	x	2	x	x	x	x	x	x	x	x
63	32	1	0	0	0	0	4	2	3	Spazieren
64	68	1	x	x		x	x	x	x	x
65	61	1	1	x	0	x	x	x	x	Pilzesammeln
66	35	1	1	0	0	x	7	2	3	Landwirt
67	68	2	1	0	0	x	18	3	2	Spazieren
68	34	1	1	0	1	x	40	4	2	Holzmachen
69	51	2	x	x	x	x	x	x	x	x
70	68	2	0	0	0	x	x	x	x	x
71	61	1	1	0	0	x	x	x	x	x
72	74	1	1	0	0	5	285	7	3	Gartenarbeit
73	58	1	1	0	1	0	1	1	2	Gartenarbeit
74	59	1	0	2	1	0	0	0	3	Hund
75	17	1	0	1	1	1	10	3	3	Radfahren
76	48	1	x	x	0	x	x	x	x	x
77	34	2	1	0	0	0	1	1	3	Wandern
78	42	2	1	0	0	2	48	4	3	Hunde, Wandern, Pilzesammeln, Joggen
79	39	2	1	0	0	x	x	x	x	x
80	60	1	0	0	0	2	84	5	3	Hund
81	62	1	0	0	x	x	x	x	x	x
82	47	1	1	0	1	0	4	2	1	Wandern
83	41	2	0	0	1	0	1	1	1	Besuch Garten Freunde
84	69	2	1	3	0	3	153	6	3	eigener Garten, Spazieren
85	42	2	1	0	0	4	96	5	3	Spaziere, Pilze, Laufen, Radfahren
86	56	1	1	2	0	4	152	6	3	Hund
87	41	1	1	0	1	2	46	4	3	Imker
88	61	1	1	0	1	5	305	7	3	Joggen, Hund
89	43	1	0	0	1	8	225	6	3	Landschaftsgärtner
90	65	1	1	0	1	10	740	7	2	Pilze sammeln
91	60	1	0	0	1	4	168	6	3	Gartenarbeit
92	20	1	1	0	0	0	2	2	1	Wandern
93	51	1	1	0	0	1	1	1	3	Hund
94	22	2	0	3	0	0	0	0	2	Hund, Walken
95	62	1	x	0	x	x	x	x	x	x
96	63	2	0	0	0	2	88	5	3	Gartenarbeit
97	45	2	1	0	0	0	2	2	3	Gartenarbeit
98	70	2	1	3	0	0	10	3	2	Spazieren, Garten
99	67	1	0	0	1	0	0	0	1	Pfälzer wald
100	50	1	0	0	0	0	8	2	2	Wandern
101	48	2	1	0	0	x	x	x	x	Hund
39/2	42	1	1	0	1	3	75	5	2	Pilze, Holmachen
41/2	34	1	1	0	1	30	480	7	3	Landwirt, Waldarbeit
42/2	26	1	1	0	1	2	16	3	3	Landwirt
43/2	51	2	1	0	1	0	7	2	3	Gartenarbeit, Spaziergang
44/2	69	2	1	0	1	x	x	x	x	Gartenarbeit, Spaziergang
70/2	33	1	1	0	1	x	x	x	x	x
73/2	39	2	1	0	1	0	1	1	3	Spazierengehen, Joggen
91/2	48	2	1	0	1	1	30	4	2	Spazieren, Blindenhund
95/2	32	1	0	0	1	0	7	2	3	Katze
Vaccination1: 0=none, 1=aktive "eine", 2=aktive "zwei" 3= aktive komplett, 4=aktive postexpo, 5=passive IgG
Aktivität2: kursiv = berufliche Exposition
Tick-bites3 : kumulative Zeckenstiche: 0=negativ; 1=erster erinnerlicher; 2= <10; 3=10-25; 4=25-50; 5=50-100;6= 101-250; 7=>250
Häufigkeit Aufenthalt im Waldt4 : Häufigkeit Aktivitäten im Wald 0=nie, 1=selten bis gelegnetlich, 2=mehrmals/pro Woche, 3=täglich
Sex 1=män., 2=weibl.
